# Supplementary material
Source: Springer Nature journal article supplement (https://www.springermedizin.de/resource/supplementary/13058_2009_2544_MOESM8_ESM.pdf/9701666)

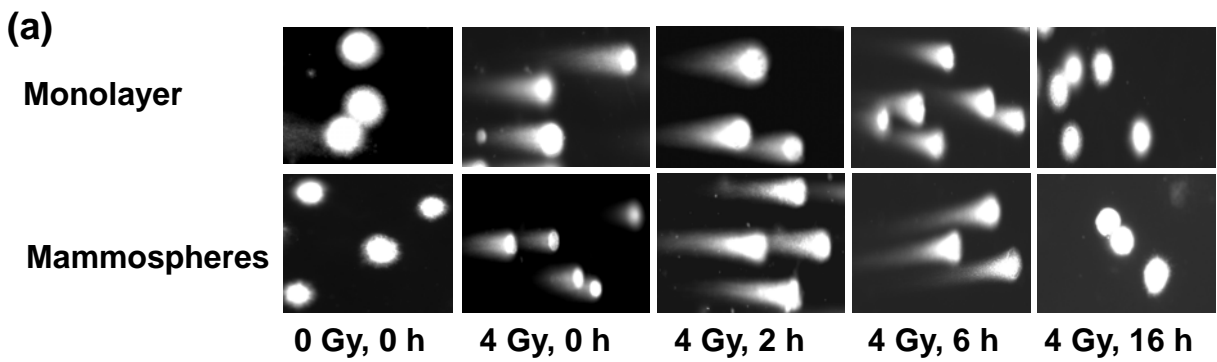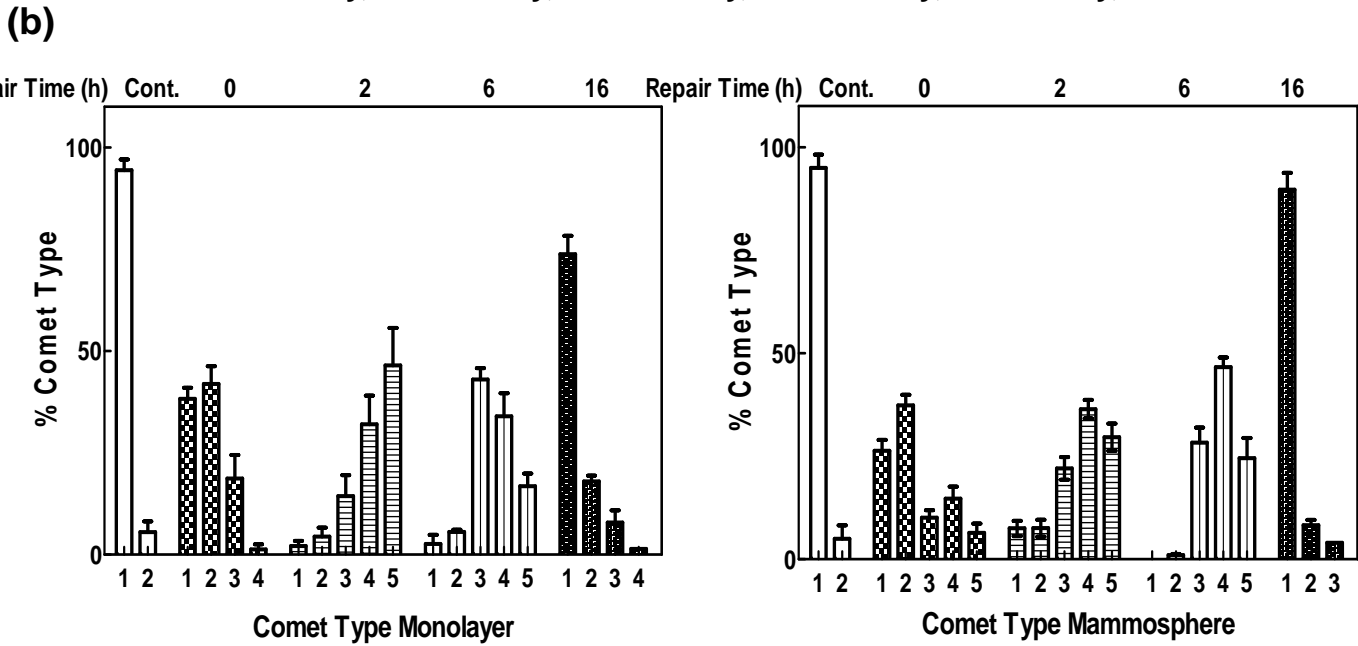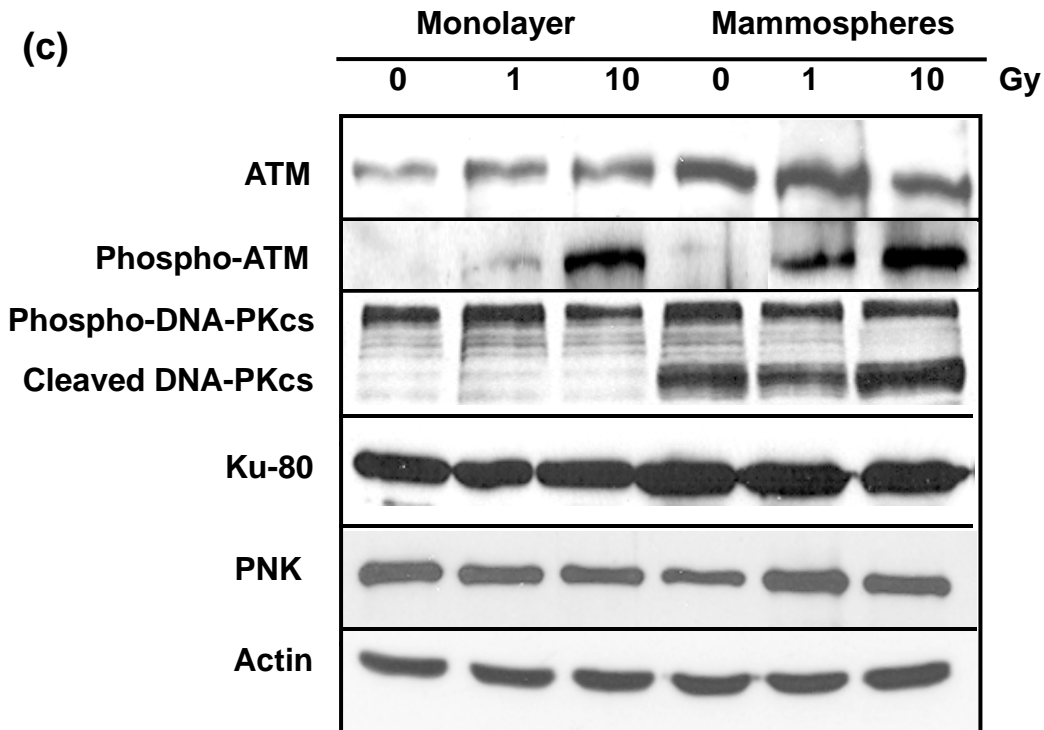

Supplement: MOESM8 [file 9701666]
